# Supplementary material for: Key biosynthetic gene subfamily recruited for pheromone production prior to the extensive radiation of Lepidoptera
Source: PubMed Central journal article supplement (PMC2584044; doi:10.1186/1471-2148-8-270), 2008-10-02

Lepidoptera-specific lineages

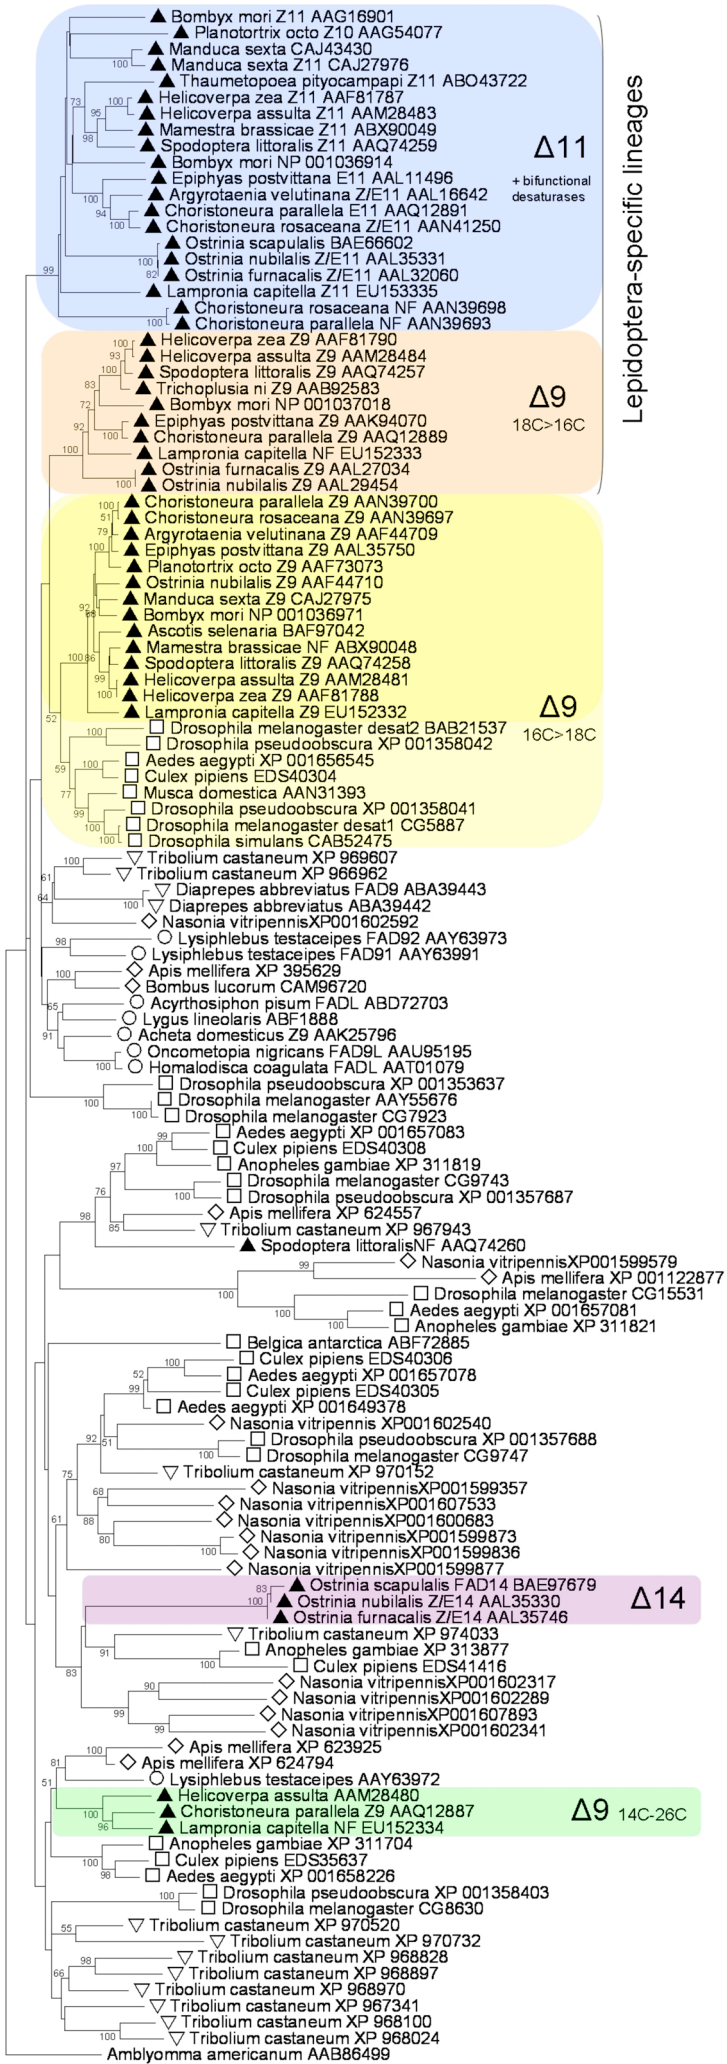

Supplement: 1471-2148-8-270-S1.pdf [file 1471-2148-8-270-S1.pdf]
